# Supplementary material for: Zika Virus Infection Preferentially Counterbalances Human Peripheral Monocyte and/or NK Cell Activity
Source: PubMed Central journal article supplement (PMC5874443; doi:10.1128/mspheredirect.00120-18), 2018-03-28
Supplement: sph002182504sf3.pdf [file sph002182504sf3.pdf]

**A**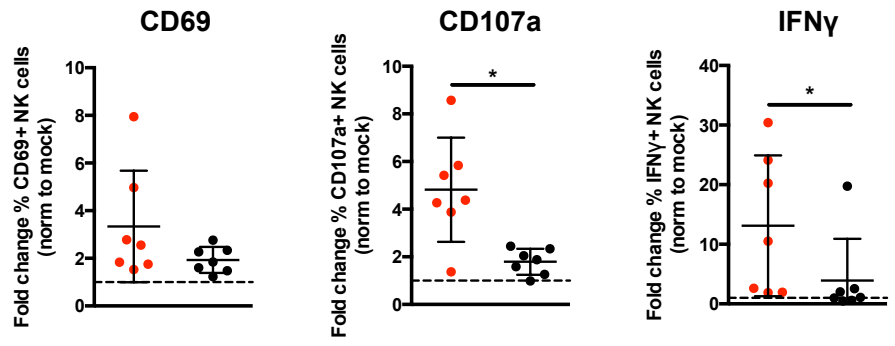**B**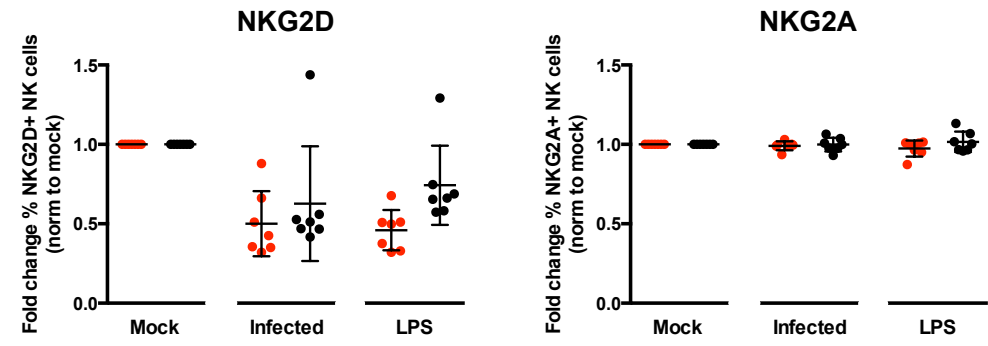**C**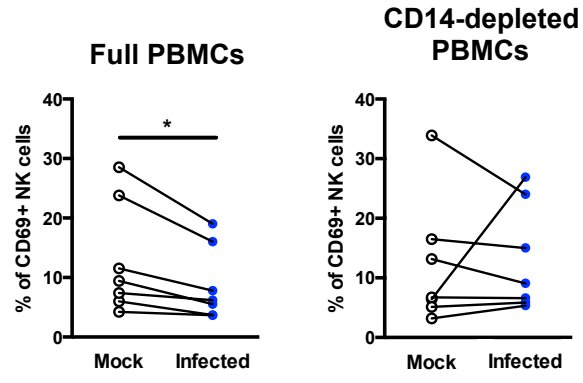**D**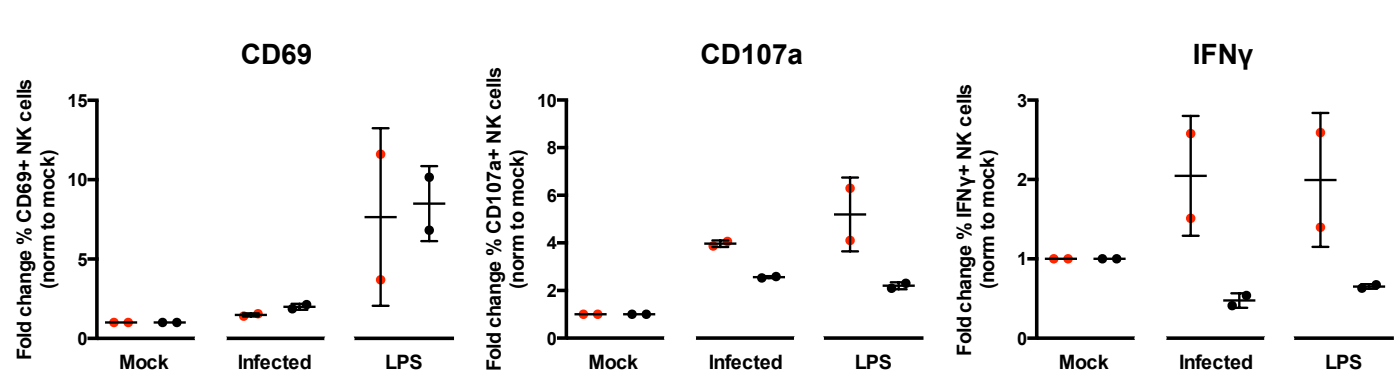

● Whole PBMCs ● CD14-depleted PBMCs

Supplemental Figure 3
